# Supplementary material
Source: PubMed Central journal article supplement (PMC8373245)
Supplement: jcm.00603-21-s0001.pdf [file jcm.00603-21-s0001.pdf]

1 **Table S1. Comprehensive analysis of QuantiFERON-TB Gold Plus indeterminate results.**

| Case | Age | Gender | Setting      | QFT CLIA (IU/mL) |      |             |             |             | QFT ELISA (IU/mL) |      |             |             |             | Lymphocytes<br>(x10 <sup>9</sup> /L) <sup>a</sup> | Relevant clinical history                           |
|------|-----|--------|--------------|------------------|------|-------------|-------------|-------------|-------------------|------|-------------|-------------|-------------|---------------------------------------------------|-----------------------------------------------------|
|      |     |        |              | Result           | NIL  | TB1-<br>NIL | TB2-<br>NIL | MIT-<br>NIL | Result            | NIL  | TB1-<br>NIL | TB2-<br>NIL | MIT-<br>NIL |                                                   |                                                     |
| 1    | 21  | F      | Outpatient   | I                | 0.93 | -0.11       | -0.07       | -0.01       | I                 | 0.42 | -0.01       | 0.01        | -0.01       | 0.03                                              | Acute myeloid leukemia                              |
| 2    | 55  | M      | Hospitalized | I                | 0.06 | -0.01       | -0.03       | 0.04        | I                 | 0.02 | -0.01       | -0.01       | 0.02        | 0.36                                              | Severe COVID-19**                                   |
| 3    | 76  | M      | Hospitalized | I                | 0.04 | -0.02       | -0.02       | 0.40        | I                 | 0.03 | -0.01       | -0.01       | 0.14        | 0.20                                              | Severe COVID-19**                                   |
| 4    | 44  | M      | Hospitalized | I                | 0.03 | 0.01        | -0.01       | 0.37        | I                 | 0.06 | -0.02       | -0.02       | 0.20        | 1.43                                              | Non COVID-19-related pneumonia                      |
| 5    | 59  | M      | Hospitalized | I                | 0.02 | -0.00       | -0.00       | 0.11        | I                 | 0.01 | 0.01        | 0.01        | 0.06        | 0.53                                              | Severe COVID-19**                                   |
| 6    | 80  | M      | Hospitalized | I                | 0.13 | 0.00        | -0.00       | 0.35        | I                 | 0.08 | 0.01        | 0.00        | 0.22        | 1.14                                              | Non COVID-19-related pneumonia                      |
| 7    | 70  | F      | Hospitalized | I                | 0.04 | 0.01        | -0.00       | 0.32        | I                 | 0.03 | 0.02        | -0.01       | 0.14        | 0.61                                              | Severe COVID-19**                                   |
| 8    | 49  | F      | Hospitalized | I                | 0.01 | -0.00       | 0.00        | 0.06        | I                 | 0.02 | 0.00        | -0.01       | 0.02        | 0.88                                              | Severe COVID-19**                                   |
| 9    | 45  | M      | Hospitalized | I                | 0.03 | 0.01        | 0.01        | 0.05        | I                 | 0.02 | -0.01       | -0.01       | 0.03        | 1.12                                              | Severe COVID-19**                                   |
| 10   | 53  | M      | Hospitalized | I                | 0.05 | 0.01        | 0.02        | 0.14        | I                 | 0.02 | 0.01        | 0.03        | 0.12        | 0.86                                              | Severe COVID-19**                                   |
| 11   | 74  | M      | Hospitalized | I*               | 0.04 | 0.34        | 0.04        | 0.42        | I*                | 0.03 | 0.20        | 0.01        | 0.26        | 1.01                                              | Severe COVID-19**, and bladder cancer               |
| 12   | 81  | M      | Hospitalized | I                | 0.08 | 0.02        | 0.05        | 0.19        | I                 | 0.04 | 0.01        | 0.03        | 0.10        | 0.14                                              | Severe COVID-19**, and history of kidney transplant |
| 13   | 50  | M      | Hospitalized | I                | 0.15 | -0.13       | 0.08        | 0.17        | I                 | 0.03 | 0.01        | 0.02        | 0.06        | 0.69                                              | Severe COVID-19**                                   |
| 14   | 57  | M      | Hospitalized | I                | 0.00 | 0.08        | 0.10        | 0.41        | I                 | 0.02 | 0.02        | 0.02        | 0.19        | 0.64                                              | Severe COVID-19**                                   |

2 \*Borderline results (equivocal range between 0.20-0.70 IU/mL).

3 \*\*Most severe COVID-19 patients were under treatment with immunosuppressive drugs (corticosteroids, tocilizumab, anakinra... etc.) at the  
4 time of the QuantiFERON-TB Gold Plus test.

5 <sup>a</sup>Lymphocyte count was determined at the time of the QuantiFERON-TB Gold Plus test.

- 6 Abbreviations: IU, international units; CLIA, chemiluminescence immunoassay; ELISA, enzyme-linked immunosorbent assay; MIT, mitogen; M,
- 7 male; F, female; I, indeterminate.
